# Supplementary material for: Lung Ultrasound to Phenotype Chronic Lung Allograft Dysfunction in Lung Transplant Recipients. A Prospective Observational Study
Source: PubMed Central journal article supplement (PMC7961975; doi:10.3390/jcm10051078), 2021-03-05
Supplement: jcm-10-01078-s001.pdf [file jcm-10-01078-s001.pdf]

**Table S1.** Specific pleural LUS findings in RAS and BOS patients.

| <b>Pleura Characteristic</b>          | <b>RAS</b><br>(n = 6) | <b>BOS</b><br>(n = 19) |
|---------------------------------------|-----------------------|------------------------|
| Thickening                            | 6 (100.0%)            | 13 (68.4%)             |
| Fragmented only (any section)         | 0                     | 1 (5.3%)               |
| Thickening only (any section)         | 0                     | 4 (21.1%)              |
| Thickening + fragmented (any section) | 6 (100.0%)            | 7 (36.8%)              |
| Average thickness (mm)                | 5.6 (4 to 9) *        | 2.9 (1 to 8)           |

\*Wilcoxon rank-sum test:  $p = 0.0015$ .

Abbreviations: BOS = bronchiolitis obliterans syndrome; LL = left lower area; LU = left upper area; RAS = restrictive allograft syndrome; RL = right lower area; RM = right middle area; RU = right upper area.

**Table S2.** Specific parenchymal and pleural HRCT findings in RAS and BOS patients.

| <b>Characteristic</b>                      |       | <b>RAS</b><br>(n = 6) | <b>BOS</b><br>(n = 19) | <i>p</i> -value (Chi2) |
|--------------------------------------------|-------|-----------------------|------------------------|------------------------|
| <i>Parenchyma</i>                          |       |                       |                        |                        |
| Apical fibrosis RUC/RUP/LUC/LUP            | N (%) | 6 (100)               | 4 (21)                 | 0.00058                |
| Apical groundglass opacity RUC/RUP/LUC/LUP | N (%) | 5 (83)                | 8 (42)                 | 0.078                  |
| <i>Pleura</i>                              |       |                       |                        |                        |
| Thickening RUC/RUP/LUC/LUP                 | N (%) | 6 (100)               | 8 (42)                 | 0.013                  |

Abbreviations: BOS = bronchiolitis obliterans syndrome; LUC = left upper central area; LUP = left upper peripheral area; RAS = restrictive allograft syndrome; RL = right lower area; RM = right middle area; RUC = right upper central area; RUP = right upper peripheral area.

**Table S3.** Advantages and disadvantages of HRCT and LUS for subtyping CLAD.

|             | <b>Advantages</b>                                                                                                                                                                                                                                                                   | <b>Disadvantages</b>                                                                     |
|-------------|-------------------------------------------------------------------------------------------------------------------------------------------------------------------------------------------------------------------------------------------------------------------------------------|------------------------------------------------------------------------------------------|
| <b>LUS</b>  | Minimal time-consuming<br>Cheap<br>Easy feasible<br>Frequent monitoring possible<br>Radiation-free<br>High accuracy for pleural pathology<br>May trigger further CLAD examination by identification of the "RAS-sign"<br>Ruling out other pathological findings not related to CLAD | Cannot identify BOS<br>Only suggestive of PPFE-pattern compatible with RAS               |
| <b>HRCT</b> | Confirmative of radiological RAS and BOS patterns<br>Can quantify pathological pleural and parenchymal affection<br>Ruling out other pathological findings not related to CLAD                                                                                                      | Radiation risk<br>Time-consuming<br>Resource heavy (referral and logistics)<br>Expensive |

Abbreviations: CLAD = chronic lung allograft dysfunction; HRCT = high-resolution computed tomography; LUS = lung ultrasound; PPFE = pleuroparenchymal fibroelastosis; RAS = restrictive allograft syndrome.
